# Supplementary material for: Reduced-Beclin1-Expressing Mice Infected with Zika-R103451 and Viral-Associated Pathology during Pregnancy
Source: MDPI journal article supplement (doi:10.3390/v12060608), 2020-06-02
Supplement: s1 [file s1]

# Reduced-Beclin1-Expressing Mice Infected with Zika-R103451 and Viral-Associated Pathology during Pregnancy

**Mohan Kumar Muthu Karuppan<sup>1</sup>, Chet Raj Ojha<sup>1</sup>, Myosotys Rodriguez<sup>1</sup>, Jessica Lapierre<sup>1</sup>, M. Javad Aman<sup>3</sup>, Fatah Kashanchi<sup>2</sup>, Michal Toborek<sup>4</sup>, Madhavan Nair<sup>1</sup> and Nazira El-Hage<sup>1\*</sup>.**

<sup>1</sup> Department of Immunology and Nanomedicine, Herbert Wertheim College of Medicine, Florida International University, Miami, FL 33199, USA

<sup>2</sup> National Center for Biodefense and Infectious Diseases, George Mason University, Manassas, VA, 20110, USA

<sup>3</sup> Integrated biotherapeutics, Rockville, MD, 20850, USA

<sup>4</sup> Department of Biochemistry and Molecular Biology, University of Miami Miller School of Medicine, Miami, FL 33136, USA.

\* Correspondence: Dr. Nazira El-Hage, Department of Immunology and Nanomedicine, Florida International University, Herbert Wertheim College of Medicine, Miami, FL 33199, USA; E-mail address: nelhage@fiu.edu; Phone: (305)-348-4346; FAX: (305)-348-1109.

## SUPPLEMENTAL MATERIAL

## MATERIALS AND METHODS

### Immunohistochemistry

ZIKV infectivity was measured by fluorescent immuno-labeling. Briefly, brain tissue sections were fixed in 4% paraformaldehyde, permeabilized with 0.1% Triton X-100, and blocked in 10% milk/0.1% goat serum. The sections were then immunolabeled with the neuronal marker, mouse MAP2 (microtubules associated protein-2) antibody (Catalog# MAB378; Millipore, Boston, MA, USA), ZIKV-E antibody (Catalog# GTX133314) and ZIKV-NS1 antibody (Catalog# GTX133307) purchased from Genetex, CA, USA. Immunoreactivity was visualized with secondary antibodies from Molecular Probes (Carlsbad, CA, USA). Cell nuclei was labeled with 4',6-diamidino-2-phenylindole (DAPI). The images were analyzed using an inverted fluorescence microscope with a 560 Axiovision camera (Zeiss, Germany).

### MTT assay

Glia were grown for 24 h in their respective culture media with increased concentrations of viral proteins. Media was exchanged with protein-free medium containing 0.5 mg/mL MTT, and cells were further

incubated for 3 h. The MTT-containing medium was removed, and 100  $\mu$ L of DMSO was added to solubilize the formazan. The absorbance at 570 nm was measured to determine viability using a Synergy™ H4 Hybrid Microplate Reader (BioTek Instruments, Inc. Winooski, VT).

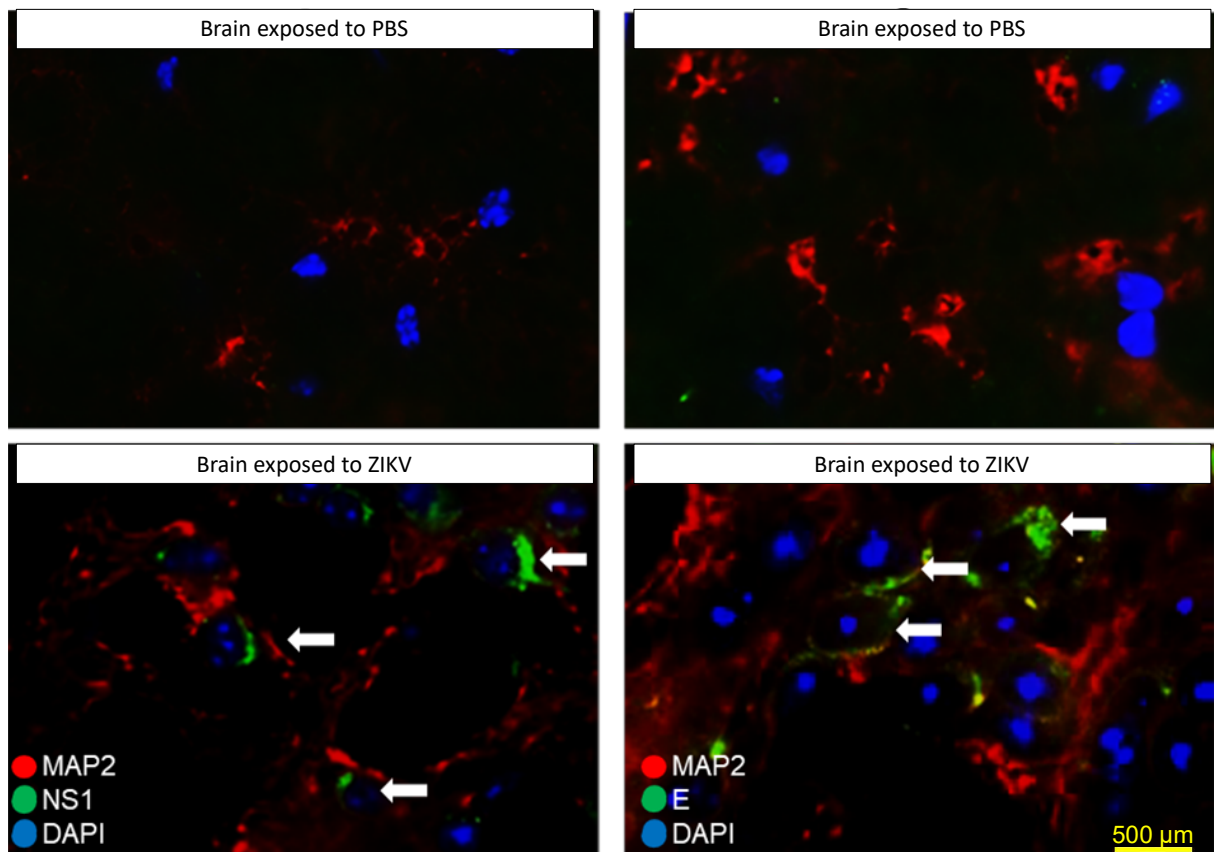

**Figure S1: Detection of viral proteins in post-mortem brains.** Immunofluorescent double labeling with antibodies against the neuronal marker, MAP2 (shown in red) and ZIKV proteins (shown in green). Expression levels of NS1 (left bottom panel) and the structural E protein (right bottom panel) are shown in brain tissues recovered from *Becn1*<sup>+/-</sup> pups born to ZIKV-infected dams. Brain tissues recovered from *Becn1*<sup>+/-</sup> pups born to mock-exposed dams showed no fluorescent labeling with NS1 or E antibodies (top panels).

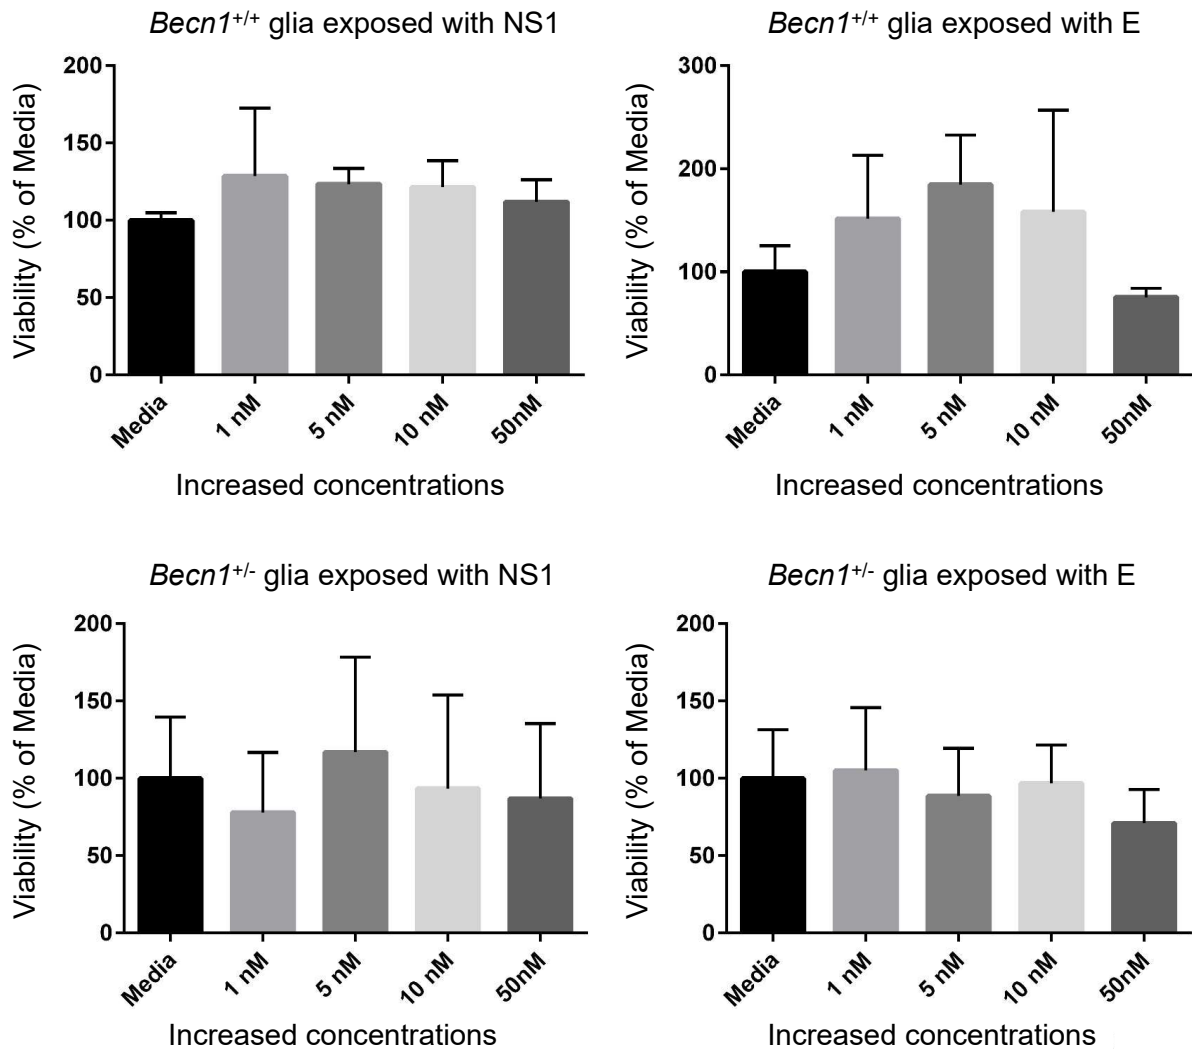

Figure S2: **Dose-response curve of viral proteins.** Cell viability was assayed after 24-hours post-treatment by the ability of live cells to reduce the tetrazolium dye 3-(4,5-dimethylthiazol-2-yl)-2,5-diphenyltetrazolium bromide (MTT) to purple formazan. NS1 (left panels) and E (right panels) proteins showed minimal toxicity to glias recovered from *Becn1*<sup>+/+</sup> (top) and *Becn1*<sup>+/-</sup> (bottom) pups. Proteins at 50nM concentrations were subsequently used to treat murine glias cultures.
